# Supplementary material
Source: Springer Nature journal article supplement (https://www.springermedizin.de/resource/supplementary/12891_2013_1936_MOESM1_ESM.pdf/9508844)
Supplement: MOESM1 [file 9508844]

Intra-Articular Facet Joint Injection (IAB)  
(n=177)

Excluded (n=53)

- Not meeting inclusion criteria (n=49)
- Other reasons (n=4)

Inclusion Criteria Met  
(n=124)

Fail (< 50% relief of pain)  
(n= 55)

Declined to participate (n=23)

Assessed for Study (Analyzed)  
Non Responder (WAD-NR)  
(n=32)

Success ( $\geq$  50% relief of pain)  
(n=69)

Diagnostic Medial Branch Block (MBB)  
(n=69)

Declined to participate (n=11)

Success ( $\geq$  50% relief of pain)  
(n=58)

Assessed for Study (Analyzed)  
Responder (WAD-R)  
(n=58)
